# Supplementary material for: Rare Earth element distribution on the Fuerteventura Basal Complex (Canary Islands, Spain): a geochemical and mineralogical approach
Source: Copernicus journal article supplement (doi:10.5194/se-15-639-2024), 2024-06-14
Supplement: Supplementary file 1 [file se-15-639-2024-supplement.zip]

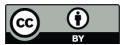

*Supplement of*

**Rare Earth element distribution on the Fuerteventura Basal Complex (Canary Islands, Spain): a geochemical and mineralogical approach**

**Marc Campeny et al.**

*Correspondence to:* Marc Campeny (mcampenyc@bcn.cat)

- se-15-639-2024-supplement-title-page.pdf
- Supplementary tables\_2024\_01\_19.xlsx

The copyright of individual parts of the supplement might differ from the article licence.
