# Supplementary material for: Rare Earth element distribution on the Fuerteventura Basal Complex (Canary Islands, Spain): a geochemical and mineralogical approach
Source: Copernicus journal article supplement (doi:10.5194/se-15-639-2024), 2024-06-14
Supplement: Supplementary file 1 [file Supplementary tables_2024_01_19.xlsx]

## Sheet: Table_S1_Samples_REE
		Sample		Locality		Coordinates (UTM)					Type
	Sector 1	69		Esquinzo ravine		599705	x	3163787	y		Trachyte
		75		Las Montañetas		599288	x	3168169	y		Carbonatite
		79a		Jablito ravine		599295	x	3168090	y		Syenite
		85a		Agua Salada ravine		599209	x	3167450	y		Carbonatite
		85b		Agua Salada ravine		599209	x	3167450	y		Carbonatite
		86		Agua Salada ravine		599273	x	3672690	y		Weathered rock
		87		Agua Salada ravine		599146	x	3167296	y		Syenite
		89		Agua Salada ravine		599146	x	3167296	y		Syenite
		93		Agua Salada ravine		583007	x	3140196	y		Carbonatite
		98		Comisiones hill		583889	x	3140607	y		Carbonatite
	Sector 2	34		Las Peñitas quarry		587622	x	3140519	y		Syenite
		35		Las Peñitas quarry		587622	x	3140519	y		Weathered rock
		36		Las Peñitas quarry		587622	x	3140519	y		Weathered rock
		37		Las Peñitas quarry		587622	x	3140519	y		Weathered rock
		38		Las Peñitas quarry		587622	x	3140519	y		Weathered rock
		39		Pájara - FV-30 road		588317	x	3139257	y		Trachyte
		40		Las Peñitas lookout		588757	x	3139402	y		Syenite
		41		Las Peñitas lookout		588757	x	3139402	y		Weathered rock
		42		Las Peñitas lookout		588757	x	3139402	y		Weathered rock
		44		Pájara - FV-30 road		589726	x	3140793	y		Syenite
		45		Pájara - FV-30 road		589726	x	3140793	y		Weathered rock
		46		Pájara - FV-30 road		589726	x	3140793	y		Weathered rock
		47		Pájara - FV-30 road		589726	x	3140793	y		Weathered rock
		49		Pájara - FV-30 road		589726	x	3140793	y		Weathered rock
		54		Pájara		587911	x	3136187	y		Syenite
		56A		Pájara		587911	x	3136187	y		Weathered rock
		57		Pájara		587911	x	3136187	y		Calcrete
		59		Betancuria		592097	x	3143335	y		Syenite
		60		Palomares ravine		592039	x	3142346	y		Syenite
		61		Palomares ravine		592039	x	3142346	y		Syenite
		63		Palomares ravine		592039	x	3142346	y		Calcrete
	Sector 3	12		Aulagar ravine		584260	x	3140657	y		Carbonatite
		14		Aulagar ravine		584260	x	3140657	y		Calcrete
		15		Aulagar ravine		584260	x	3140657	y		Calcrete
		18		Aulagar ravine		584322	x	3140610	y		Calcrete
		30		Aulagar ravine		584197	x	3140538	y		Carbonatite
		31		Aulagar ravine		584162	x	3140545	y		Ijolite
		102		Punta del Viento		582049	x	3139162	y		Syenite
		104		Punta Peñón Blanco		578542	x	313442	y		Carbonatite
		106		Punta Peñón Blanco		578579	x	3134428	y		Carbonatite
		110a		Punta Peñón Blanco		578579	x	3134428	y		Carbonatite
		113		Montaña Blanca		582779	x	3136114	y		Syenite
		114B		Morro Recogedero		581887	x	3135997	y		Phonolite
		115		Morro Recogedero		581887	x	3135997	y		Weathered rock
		116a		Garcey ravine		582117	x	3135281	y		Weathered rock
		116b		Garcey ravine		582117	x	3135281	y		Syenite
		117		La Solapa ravine		582646	x	3137166	y		Phonolite

## Sheet: Table_S2_EPMA_carbonates
	Mineral		CALCITE
	Rock Type		Carbonatites
	num analysis		106_03	106_05	106_06	106_15	106_23	106_24	12_82	12_83	12_86	12_89	12_91	12_92	12_94	12_95	12_96	30_51	30_52	30_54	30_57	30_72	85A_39	85A_41	85A_42	85A_45	85A_46	85A_48	85A_49
	wt.%
	CO2		43.09	44.19	43.84	43.15	43.06	43.02	43.54	43.9	43.74	44.11	43.21	44.26	43.63	43.72	43.58	43.46	43.85	43.48	43.6	43.44	43.61	43.87	43.39	43.73	43.36	43.8	43.41
	SrO		2.47	0.0852	0.1412	5.43	4.16	4.19	3.75	0.9474	1.84	0.6936	3.99	0.5733	0.4659	0.4475	2.22	1.98	1.62	3.28	1.29	1.69	0.7163	0.3128	0.4077	0.4428	0.8363	0.6464	0.9103
	CaO		52.41	55.58	55.11	50.62	51.39	51.11	53.34	55.33	54.7	55.82	52.78	56.04	55.24	55.17	54.21	54.16	54.83	53.35	54.74	54.31	52.45	52.53	50.46	50.68	50.52	51.92	52.87
	MgO		0.2772	0.397	0.4559	0.19	0.1755	0.2401	0.0473	0.0407	0	0.0021	0.0439	0.0197	0.0297	0.0156	0.0143	0.0335	0.0793	0.0931	0.0269	0.0477	0.0565	0.2229	0.0831	0.2261	0.1329	0.0902	0.3807
	FeO		0.0515	0.0728	0	0.2948	0.1169	0.2834	0.004	0.0158	0	0	0	0	0.0599	0.3031	0.0886	0.014	0	0.0798	0.0418	0	0.1653	0.5483	0.2679	0.6263	0.3704	0.3881	1.2162
	MnO		0.9144	0.0336	0.0456	1.1066	1.1304	1.1171	0.0092	0	0.0073	0.0031	0	0	0	0.0399	0	0.078	0.0754	0.104	0.0609	0.0549	3.18	3.11	5.36	5.06	4.81	3.93	0.5588
	Na2O		0	0.0538	0	0.058	0	0	0.0362	0.029	0.0326	0	0.0609	0.0276	0.0207	0	0.0372	0.021	0	0	0	0.0268	0.0037	0	0.0627	0	0	0.0122	0.0311
	Total		99.2131	100.412	99.5927	100.849	100.033	99.9606	100.727	100.263	100.32	100.629	100.085	100.921	99.4462	99.6961	100.15	99.7465	100.455	100.387	99.7596	99.5694	100.182	100.594	100.031	100.765	100.03	100.787	99.3771

## Sheet: Table_S3_geochem_rocks
			Trachyte				Phonolite			Syenite														Ijolite		Carbonatite
	Sample		39	69	119		114B	117		34	40	44	54	59	60	61	79a	87	89	102	113	116b		31		12	30	75	85a	85b	93	98	104	106	110a
	wt.%
	SiO2		65.33	69.36	68.69		46.21	54.37		59.73	58.08	59.43	64.77	62.53	59.7	55.05	32.05	34.63	29.27	52.95	50.02	66.86		43.36		8.72	19.54	5.79	3.99	1.49	7.35	0.53	1.14	4.57	9.28
	TiO2		0.477	0.16	0.253		3.627	0.266		1.189	1.536	0.789	0.735	0.911	0.66	1.348	2.904	3.233	2.762	1.201	3.012	0.615		3.777		0.289	0.911	0.634	0.124	0.005	0.954	0.053	0.047	0.271	0.708
	Al2O3		17.3	15.5	14.22		16.64	19.98		18.1	16.41	19.11	18.72	17.34	16.76	16.69	12.5	12.26	10.55	18.37	16.63	15.73		12.02		0.77	5.75	1.28	1.27	0.15	2.35	0.2	0.29	1.5	2.93
	Fe2O3		2.99	1.57	2.91		9.75	2.9		4.4	6.34	3.45	1.93	3.72	3.72	6.31	12	11.25	8.06	5.66	8.4	3.45		13.76		6.27	4.91	9.8	5.92	2.69	3.77	0.67	8.73	16.72	7.73
	MnO		0.184	0.041	0.371		0.285	0.182		0.231	0.418	0.165	0.029	0.148	0.123	0.134	0.172	0.533	0.22	0.221	0.235	0.146		0.189		0.204	0.208	0.272	3.027	3.089	0.541	0.175	0.686	1.276	0.728
	MgO		0.06	0.18	0.19		3.19	0.2		1.15	1.36	0.69	0.21	0.76	0.37	0.34	2.7	4.38	5.35	1.25	2.78	0.51		7.33		1.47	2.01	0.91	1.26	1.97	1.27	0.28	0.86	1.84	1.36
	CaO		0.1	0.46	0.31		8.95	1.79		2.73	2.5	2.18	0.3	1.83	5.06	6.85	16.76	15.47	18.83	6.12	8.35	0.36		12.47		48.28	42.04	43.61	42.37	46.04	45.4	51.52	42.35	33.64	38.74
	K2O		5.2	5.28	4.63		3.85	6.87		3.95	3.33	4.53	4.79	3.17	3.94	2.88	1.04	2.56	2.43	5.69	1.04	5.14		1.07		< 0.01	0.04	0.08	0.59	0.08	0.02	< 0.01	0.22	0.38	0.71
	Na2O		6.55	5.47	6.58		4.28	9.26		6.87	7.06	7.25	5.75	7.14	4.72	4.69	5.2	3.5	2.38	4.99	6.01	6.4		2.86		0.09	0.06	0.08	0.19	0.09	0.05	0.02	0.23	0.74	0.88
	P2O5		0.05	0.02	0.04		0.75	0.04		0.22	0.43	0.15	0.1	0.24	0.24	0.5	3.56	3.88	1.15	0.18	0.72	0.05		0.54		4.38	1.37	1.77	1.89	0.17	1.61	0.4	0.07	0.12	0.95
	LOl		1.15	0.71	1.11		2.69	2.75		1.52	0.79	2.49	2.61	2.29	5.13	5.84	10.33	8.52	18.6	2.94	2.52	1.35		1.76		27.41	21.64	33.06	34.13	40	31.13	41.49	37.67	30.52	31.12
	Total		99.39	98.75	99.32		100.2	98.61		100.1	98.25	100.2	99.95	100.1	100.4	100.6	99.23	100.2	99.6	99.57	99.72	100.6		99.14		97.88	98.46	97.29	94.76	95.78	94.44	95.36	92.3	91.57	95.13
	ppm
	Ba		72	308	123		1677	1625		1540	1056	1250	1728	990	612	653	432	1442	881	5005	505	64		199		426	23	987	10860	7066	4014	1088	4204	2687	2330
	Rb		108	209	154		79	193		77	157	92	94	46	114	79	17	80	63	92	38	142		23		< 1	1	3	19	1	1	< 1	20	19	31
	Sr		26	73	47		2155	2194		661	614	461	304	186	324	483	1185	2767	1501	3631	1528	39		873		13770	2942	10480	6245	7166	27960	23630	37680	31550	18210
	Cs		0.5	3.9	1.5		0.5	1		< 0.2	< 0.2	< 0.2	< 0.2	< 0.2	< 0.2	< 0.2	< 0.2	1.5	< 0.2	< 0.2	0.5	< 0.2		< 0.2		< 0.2	< 0.2	< 0.2	< 0.2	< 0.2	< 0.2	< 0.2	< 0.2	1.5	< 0.2
	Ni		9	3	3		3	2		5	2	3	3	4	4	6	6	7	30	3	8	4		119		11	16	2	2	2	3	1	8	40	11
	Co		< 0.1	< 0.1	< 0.1		13.3	< 0.1		1.6	< 0.1	< 0.1	< 0.1	1.3	3	11.7	22	25.5	25.2	8.1	15.8	< 0.1		45		7	16	3.7	7.8	< 0.1	9.4	< 0.1	12.9	16.4	16.1
	Cr		< 0.5	< 0.5	< 0.5		4.5	< 0.5		< 0.5	< 0.5	11	< 0.5	4.5	4.5	4	26	9.5	24	10	5	4.5		258		35	63.5	9	83.5	58	38	28	55	68.5	67
	Cu		11	4	5		11	9		4	17	5	4	2	5	8	52	62	126	40	33	4		145		14	73	30	74	5	25	5	67	160	38
	Pb		6	5	25		9	24		9	8	< 5	6	< 5	7	5	< 5	45	18	< 5	8	7		< 5		6	5	< 5	67	41	18	< 5	40	47	37
	Zn		164	76	237		157	194		116	203	97	88	115	82	95	94	166	106	76	135	107		100		106	122	87	1920	170	37	25	1430	2700	2360
	Sb		0.2	0.3	0.9		0.4	0.9		0.3	0.2	0.5	0.4	0.1	0.3	0.6	< 0.1	< 0.1	0.1	0.3	0.2	0.6		< 0.1		0.4	1.2	0.1	< 0.1	0.4	0.3	< 0.1	0.6	< 0.1	0.3
	S		0.003	0.004	0.104		0.023	0.392		0.031	0.015	0.751	0.025	0.002	0.015	0.008	0.003	0.001	0.008	0.057	0.024	0.025		0.008		0.23	0.009	0.038	0.073	0.106	0.076	0.052	0.09	0.704	0.066
	V		30	14	14		351	44		36	58	33	61	25	22	79	309	327	244	187	295	22		425		117	95	335	42	13	105	11	126	24	145
	Sc		0.8	0.55	2.3		6.95	0.4		1.55	2.7	0.9	0.7	3.25	2.5	5.05	4.9	5.75	5.35	2.1	7.25	1.2		28		0.2	3.5	0.1	0.7	0.55	4.15	0	0.5	0.8	2.6
	Y		48	16	56		47	17		30	68	29	39	33	19	26	36	157	44	29	41	38		24		206	286	77	157	88	190	169	227	177	202
	U		5.4	8.75	4.2		3.97	10.7		2.24	6.83	2.93	2.66	1.74	4.7	2.98	4.23	1.94	1.77	4.19	3.48	0.74		1.31		37.6	10.6	0.55	1.59	2.28	0.65	4.06	0.78	4.23	2.91
	Th		21.1	36.1	46.5		17	38.5		8.92	44.1	10.6	12.4	6.54	19.2	10.6	18.4	35.3	11.6	15.2	16.4	26		4.31		50.9	12.4	4.06	92.3	39.4	8.02	6.06	10.1	17.8	23.7
	Hf		20.8	7.2	33.8		3.4	18.8		9.6	36.3	9.4	12.5	7.2	10.8	9.3	1.3	3	0.9	11.6	4.3	13.9		6.5		0.6	1	0.3	0.7	0.2	1.8	0.3	0.4	1.6	3.6
	Zr		1090	246	1190		285	1190		517	1850	492	665	354	517	465	46	104	70	778	233	543		291		106	82	50	28	10	39	6	3	62	186
	Nb		185	83.7	400		263	212		103	380	111	113	70.4	78.7	64.4	139	187	139	293	201	144		54.6		63.6	94.5	40	39.8	6.2	55.9	21.4	106	65.3	45.6
	Ta		13.6	6.46	22.6		12.4	3.81		6.73	20.8	8.47	8.71	4.62	6.93	4.92	7.75	6.93	5.98	5.41	11	15.7		3.7		0	1.02	0	0.16	0.2	0	0.09	0	0	< 0.01
	La		169	63	108		191	189		97.7	468	88.3	112	78.2	65.7	63.2	208	152	90.2	115	135	170		47		858	1120	345	2810	1640	1100	855	2180	3000	2130
	Ce		308	96.3	194		334	261		143	552	153	205	128	89	101	369	281	175	185	256	296		74		1610	2080	621	4750	3100	1650	1570	3350	3750	3220
	Pr		30.6	9.36	18.2		34.9	20.6		19.7	59.3	19.3	26.3	16.3	9.77	11.9	46.3	37.1	22.9	21.3	27.9	33.4		11.7		201	257	57.9	544	332	177	180	374	380	347
	Nd		95.6	29.2	54.5		123	55.5		71.7	173	66.6	95.5	63.2	32	44.4	172	148	86.7	70	104	108		49.2		752	896	202	1720	1050	604	609	1220	1140	1100
	Sm		14.1	4.73	10.9		20.1	5.94		11.7	24.2	10.5	15.7	11.7	5.6	8.5	29.2	34.2	16.2	10.5	17.6	16.7		9.85		116	136	30.4	172	100	88.7	89.7	153	121	130
	Eu		2.46	0.997	2.17		5.71	1.5		3.96	5.15	2.96	4.36	3.7	1.51	2.53	8.15	11.3	4.87	2.89	5.01	3.15		3.05		31.9	32.3	8.38	36.8	20.1	24.4	23.8	38.2	29.5	32.3
	Gd		8.86	2.93	8.38		12.1	2.71		8.81	15.3	7.09	9.7	8.66	3.78	6.65	17.5	31.2	11.5	5.55	10.5	9.39		7.57		75	87.1	18	39.1	18.4	50.2	48.5	64.1	44.9	52.7
	Tb		1.56	0.49	1.6		1.74	0.43		1.16	2.33	1.08	1.5	1.32	0.67	1.03	2.19	4.9	1.75	0.87	1.49	1.49		1.1		10.4	12	2.51	6.18	2.83	6.91	6.83	9.6	7.23	7.75
	Dy		9.48	2.85	9.6		9.64	2.73		6.52	13.7	6.33	8.44	7.5	3.81	5.61	10.4	28	9.34	5.17	8.59	8.34		5.91		47.8	64.3	14.4	33.7	15.9	37.3	35.2	48.6	37.3	42.2
	Ho		1.84	0.53	1.78		1.67	0.55		1.16	2.56	1.11	1.51	1.32	0.68	1.01	1.63	5.23	1.57	0.92	1.49	1.53		1.03		7.95	11.1	2.54	5.72	3.08	6.43	6.08	8.42	6.78	7.1
	Er		5.24	1.57	5.31		4.4	1.6		3.09	6.99	2.99	3.96	3.38	1.91	2.79	3.37	14.2	3.8	2.69	3.79	4.04		2.35		19	28.9	6.82	14.2	8.96	15.5	15.2	21.4	17.1	18.3
	Tm		0.775	0.238	0.806		0.572	0.239		0.405	0.966	0.394	0.55	0.465	0.286	0.373	0.298	1.83	0.463	0.367	0.508	0.547		0.291		2.14	3.56	0.855	1.77	1.27	1.69	1.9	2.74	2.18	2.31
	Yb		4.78	1.63	5.68		3.45	1.64		2.55	6.36	2.5	3.28	2.82	1.82	2.24	1.4	10.2	2.59	2.5	2.93	3.56		1.79		12.6	21.8	4.9	9.43	9.02	8.94	10.1	15.4	12.6	12.8
	Lu		0.696	0.259	0.85		0.48	0.268		0.38	0.987	0.357	0.458	0.411	0.276	0.337	0.19	1.33	0.354	0.402	0.408	0.567		0.263		1.73	3.04	0.73	1.23	1.45	1.15	1.45	2.2	1.88	1.76
	LREE		630.18	207.007	397.75		722.55	536.68		357.73	1299.28	348.83	470.06	311.08	208.03	239.21	852.34	699.7	409.12	411.11	557.5	638.13		203.47		3654.3	4620.4	1285.19	10078.1	6263.33	3701.21	3382.83	7388.9	8472.63	7019.75
	HREE		22.811	7.077	24.026		20.212	7.027		14.105	31.563	13.681	18.198	15.896	8.782	12.36	17.288	60.79	18.117	12.049	17.716	18.584		11.634		91.22	132.7	30.245	66.05	39.68	71.01	69.93	98.76	77.84	84.47
	ΣREY		701.791	230.634	480.076		796.712	561.107		403.385	1401.54	392.411	527.958	363.226	238.312	282.62	910.528	923.24	476.587	454.259	623.466	695.914		267.104		3951.72	5042.6	1392.54	10301.8	6391.56	3966.37	3621.76	7715.16	8728.27	7308.82

## Sheet: Table_S4_geochem_weathering
			Weathered magmatic rocks																	Calcretes
	Sample		35	36	37	38	41	42	45	46	47	49	56A	86	115	116a	118b	118c		14	15	18	57	63
	wt.%
	SiO2		59.35	56.35	57.83	61.26	58.82	51.45	60.48	6.63	58.62	50.08	62.81	53.67	16.84	21.65	59.5	16.33		14.32	14.03	8.03	6.58	14.85
	TiO2		1.04	1.153	1.139	1.52	1.413	1.154	0.855	0.111	0.994	0.991	0.461	0.576	0.58	0.108	0.155	0.197		0.354	0.396	0.065	0.08	0.31
	Al2O3		18.69	20.11	20.07	16.35	18.04	16.46	19.22	2.56	17.93	17.4	15.78	17.94	4.19	1.57	14.63	4.15		1.8	2	0.69	1.29	4.35
	Fe2O3		4.28	5.21	4.93	5.89	5.56	5.48	3.39	1.02	3.85	5.74	2.45	6.3	2.3	0.63	2.97	1.85		3.49	3.81	0.42	0.83	3.7
	MnO		0.189	0.194	0.1	0.168	0.179	0.173	0.139	0.027	0.198	0.108	0.085	0.131	0.034	0.012	0.572	0.201		0.095	0.153	0.008	0.024	0.031
	MgO		0.66	0.8	0.57	0.78	1.19	1.34	0.61	1.56	0.9	1.42	0.44	1.25	3.63	8.53	0.54	2.36		7.91	6.29	4.15	2.82	1.57
	CaO		1.81	1.54	0.91	0.99	2.51	6.99	1.43	46.88	2.84	5.74	3.5	3.68	34.75	30.75	5.11	38.05		37.28	38.08	44.68	47.17	37.98
	K2O		3.79	3.11	3.04	3.22	3.7	3.21	4.8	0.4	4.47	3.49	3.77	8.6	0.86	0.4	4.14	1.11		0.14	0.23	0.12	0.28	0.74
	Na2O		6.46	5.75	5.97	3.77	6.36	5.19	6.51	0.26	5.9	3.33	5.92	3.36	0.96	0.98	6.54	1.53		0.19	0.35	0.23	0.29	0.94
	P2O5		0.2	0.17	0.1	0.19	0.39	0.22	0.16	0.11	0.14	0.12	0.08	0.16	0.18	0.09	0.14	0.18		0.11	0.13	0.1	0.1	0.23
	LOl		2.72	5.56	5.26	5.2	2.46	8.9	2.19	40.01	3.99	11.94	5.25	3.53	34.85	36.02	5.16	33.51		34.89	34.19	41.17	41	34.09
	Total		99.2	99.94	99.92	99.33	100.6	100.6	99.8	99.56	99.84	100.4	100.5	99.2	99.15	100.7	99.45	99.47		100.6	99.66	99.65	100.5	98.8
	ppm
	Ba		1368	1162	821	771	1080	923	1444	270	1522	962	172	5953	358	72	430	174		26	65	1660	193	166
	Rb		77	65	77	84	91	89	105	14	96	102	62	116	22	10	89	26		3	4	4	6	21
	Sr		750	678	540	323	683	576	461	226	431	290	307	1465	612	412	110	611		259	286	493	558	282
	Cs		< 0.2	1	2.5	1.5	2	1.6	0.4	< 0.2	< 0.2	2	< 0.2	0.5	< 0.2	< 0.2	< 0.2	< 0.2		< 0.2	< 0.2	< 0.2	< 0.2	< 0.2
	Ni		10	16	10	21	9	14	6	6	7	29	4	2	39	14	8	16		166	266	20	7	8
	Co		< 0.1	3.5	2.8	9	3.2	7.1	1.8	2.3	2.3	10.1	< 0.1	4.3	13.6	4	< 0.1	4.2		25.4	48.8	6.9	2.8	7.3
	Cr		8	23.5	20	52.5	7	24.5	< 0.5	12	20.5	51	5	< 0.5	56	30	3.5	58.3		239	216	12.5	8	13
	Cu		5	6	7	17	6	17	5	3	5	10	3	10	27	35	5	7		49	42	45	13	13
	Pb		< 5	9	10	15	7	7	6	< 5	5	12	< 5	< 5	< 5	< 5	5	< 5		< 5	< 5	< 5	< 5	< 5
	Zn		114	133	103	113	149	113	94	21	98	96	80	94	30	18	196	70		21	38	7	15	62
	Sb		0.2	0.3	0.4	0.6	0.2	0.2	0.1	< 0.1	0.3	0.6	0.4	< 0.1	0.3	< 0.1	0.3	0.3		0.4	0.3	< 0.1	0.2	0.3
	S		0.054	0.022	0.025	0.023	0.01	0.019	0.03	0.061	0.015	0.025	0.025	0.016	0.07	0.12	0.022	0.074		0.029	0.045	0.122	0.1	0.067
	V		36	50	53	82	68	72	41	17	43	94	94	266	66	20	16	28		65	75	14	32	38
	Sc		1.9	3.65	3.35	5.95	2.9	4	0.95	1.55	1.5	6.95	0.65	0.4	3.5	1.55	1.8	2.32		8.05	4.75	0.75	0.45	2.45
	Y		48	40	37	33	43	42	33	11	45	37	29	6	11	6	37	27		7	4	4	5	9
	U		2.36	3.04	3.02	3.59	3.18	2.98	3.56	1.05	2.55	2.54	3.1	0.33	0.72	0.62	3.84	2.7		0.7	0.54	0.37	0.88	1.52
	Th		9.09	9.49	11.4	13.4	13.4	12.7	14.3	1.82	10.8	12.7	14	1.69	3.65	1.73	19.1	6.95		0.49	0.53	0.57	0.94	2.6
	Hf		10.4	10.5	12.6	11.8	12.4	11.7	12.1	0.9	9.8	8.9	12.9	6.2	2.6	1.5	20.8	13.8		0.6	0.7	0.4	1.1	2.1
	Zr		509	582	606	592	608	616	742	47	508	458	681	293	128	61	972	827		31	30	20	57	110
	Nb		126	105	127	96.7	125	110	120	10.7	132	96.4	112	63.8	15.6	11	175	47.8		4.4	5.8	1.7	8.7	16
	Ta		10.8	7.73	9.19	7.38	9.07	7.74	9.21	0.72	11.9	7.35	8.12	1.66	0.28	0.97	10.7	0.11		0	0	0	0.57	0.39
	La		135	128	100	90.8	113	89.2	91.9	20.5	104	84.7	108	21.6	22.9	14.5	101	65		10.6	6.28	3.25	9.11	17.4
	Ce		220	214	158	141	179	162	165	19	193	153	166	41	42	21	178	115		15.8	11	6.61	13	22
	Pr		33.1	26.5	22.6	19	24.7	20.6	21	3.47	26.2	20.8	18.9	4.71	4.64	2.48	18.5	12.7		2.05	1.29	0.74	1.73	3.11
	Nd		127	95.3	81.5	67.6	89.8	75.8	73	13.3	94	74.8	62.1	17.2	17.3	8.29	58.5	42.9		8.4	5.79	3.07	6.29	12.1
	Sm		22.4	15.8	14	11.4	15.6	13	11.7	2.31	15.6	13	9.13	2.89	3.09	1.39	10.1	7.69		1.83	1.19	0.57	1.02	2.16
	Eu		5.51	4.27	4.18	2.99	4.13	3.48	2.93	0.536	3.65	3.09	1.8	0.679	0.852	0.272	1.72	1.18		0.688	0.42	0.122	0.282	0.662
	Gd		14.5	10.7	9.92	7.43	10.4	9.24	7.34	1.87	10.3	9.02	5.7	1.88	2.26	0.99	6.15	4.94		1.63	0.93	0.53	0.75	1.81
	Tb		2.11	1.56	1.43	1.23	1.6	1.4	1.15	0.28	1.62	1.35	0.97	0.29	0.34	0.16	1.12	0.79		0.26	0.15	0.08	0.11	0.29
	Dy		11.6	8.48	8.07	7.27	9	8.26	6.75	1.65	9.5	7.81	5.62	1.5	1.77	0.86	6.5	4.46		1.41	0.77	0.46	0.64	1.69
	Ho		1.96	1.47	1.47	1.38	1.64	1.58	1.23	0.32	1.64	1.4	1.1	0.25	0.34	0.16	1.19	0.82		0.26	0.13	0.09	0.11	0.31
	Er		4.94	3.79	3.89	3.66	4.34	4.34	3.43	0.8	4.33	3.87	3.07	0.68	0.89	0.44	3.27	2.18		0.64	0.33	0.27	0.31	0.84
	Tm		0.596	0.512	0.503	0.53	0.617	0.633	0.487	0.101	0.569	0.512	0.435	0.087	0.124	0.061	0.468	0.299		0.091	0.043	0.037	0.044	0.118
	Yb		3.36	2.99	3.21	3.46	3.76	3.8	3.05	0.67	3.27	3.06	2.89	0.57	0.75	0.38	3.1	1.78		0.55	0.24	0.23	0.24	0.76
	Lu		0.468	0.439	0.428	0.521	0.524	0.544	0.457	0.094	0.491	0.442	0.428	0.083	0.111	0.056	0.446	0.255		0.071	0.031	0.03	0.029	0.115
	LREE		559.62	496.13	391.63	341.45	438.23	374.72	374.02	61.266	448.37	359.76	372.6	90.249	93.382	49.082	375.09	250.2		41.258	27.05	14.972	32.292	59.532
	HREE		22.924	17.681	17.571	16.821	19.881	19.157	15.404	3.635	19.8	17.094	13.543	3.17	3.985	1.957	14.974	9.794		3.022	1.544	1.117	1.373	3.833
	ΣREY		630.544	553.811	446.201	391.271	501.111	435.877	422.424	75.901	513.17	413.854	415.143	99.419	108.367	57.039	427.064	286.994		51.28	32.594	20.089	38.665	72.365
